# Supplementary material for: The opinion of post graduate students on objective structured clinical examination in Anaesthesiology: A preliminary report
Source: PubMed Central journal article supplement — Indian J Anaesth. 2016 Mar;60(3):168–73. doi: 10.4103/0019-5049.177869 (PMC4800932; doi:10.4103/0019-5049.177869), 2016-03
Supplement: IJA-60-168_Suppl1.pdf [file IJA-60-168_Suppl1.pdf]

**ANNEXURE I**

| Name (optional)                                                                                                                                                                                                                                                                                           | Survey on OSCE |       |                                  |       | Sex M/F   |                            |
|-----------------------------------------------------------------------------------------------------------------------------------------------------------------------------------------------------------------------------------------------------------------------------------------------------------|----------------|-------|----------------------------------|-------|-----------|----------------------------|
|                                                                                                                                                                                                                                                                                                           | Age            | Years | Please tick the correct response |       |           |                            |
|                                                                                                                                                                                                                                                                                                           |                |       | Strongly agree                   | Agree |           | Neither agree nor disagree |
| <b>Section I</b>                                                                                                                                                                                                                                                                                          |                |       |                                  |       |           |                            |
| OSCE examination conducted was fair                                                                                                                                                                                                                                                                       |                |       |                                  |       |           |                            |
| Wide knowledge area covered                                                                                                                                                                                                                                                                               |                |       |                                  |       |           |                            |
| Needed more time at station                                                                                                                                                                                                                                                                               |                |       |                                  |       |           |                            |
| Examination was very stressful                                                                                                                                                                                                                                                                            |                |       |                                  |       |           |                            |
| OSCE less stressful than other exams                                                                                                                                                                                                                                                                      |                |       |                                  |       |           |                            |
| Examination was well structured and sequenced                                                                                                                                                                                                                                                             |                |       |                                  |       |           |                            |
| OSCE allows students to compensate in some areas                                                                                                                                                                                                                                                          |                |       |                                  |       |           |                            |
| OSCE highlights area of weakness                                                                                                                                                                                                                                                                          |                |       |                                  |       |           |                            |
| Examination was intimidating                                                                                                                                                                                                                                                                              |                |       |                                  |       |           |                            |
| Wide range of critical areas covered                                                                                                                                                                                                                                                                      |                |       |                                  |       |           |                            |
| Students aware of level of information required                                                                                                                                                                                                                                                           |                |       |                                  |       |           |                            |
| <b>Section II</b>                                                                                                                                                                                                                                                                                         |                |       |                                  |       |           |                            |
| Question asked and procedures asked to perform at the station fair                                                                                                                                                                                                                                        |                |       |                                  |       |           |                            |
| Sequence of station logical                                                                                                                                                                                                                                                                               |                |       |                                  |       |           |                            |
| Examination provided opportunity to learn                                                                                                                                                                                                                                                                 |                |       |                                  |       |           |                            |
| <b>Section III</b>                                                                                                                                                                                                                                                                                        |                |       |                                  |       |           |                            |
| Personality, gender and social relations will not affect outcome of the results                                                                                                                                                                                                                           |                |       |                                  |       |           |                            |
| OSCE practical and useful experience                                                                                                                                                                                                                                                                      |                |       |                                  |       |           |                            |
| OSCE score standardized                                                                                                                                                                                                                                                                                   |                |       |                                  |       |           |                            |
| OSCE is a true measure of clinical skills                                                                                                                                                                                                                                                                 |                |       |                                  |       |           |                            |
| <b>Section IV</b>                                                                                                                                                                                                                                                                                         |                |       |                                  |       |           |                            |
| Revision made to do before examination about different types of clinical procedures                                                                                                                                                                                                                       |                |       | Poor                             | Good  | Very good | Excellent                  |
| General idea of OSCE given before hand                                                                                                                                                                                                                                                                    |                |       |                                  |       |           |                            |
| Quality of lab/mannequin                                                                                                                                                                                                                                                                                  |                |       |                                  |       |           |                            |
| Availability of all equipments and simulation                                                                                                                                                                                                                                                             |                |       |                                  |       |           |                            |
| Cooperation of staff to answer your queries                                                                                                                                                                                                                                                               |                |       |                                  |       |           |                            |
| <b>Section V</b>                                                                                                                                                                                                                                                                                          |                |       |                                  |       |           |                            |
| According to you which method is                                                                                                                                                                                                                                                                          |                |       | MCQ                              | OSCE  | Viva voce | Long question              |
| Fairest                                                                                                                                                                                                                                                                                                   |                |       |                                  |       |           |                            |
| Easiest                                                                                                                                                                                                                                                                                                   |                |       |                                  |       |           |                            |
| In which examination do you need to study more                                                                                                                                                                                                                                                            |                |       |                                  |       |           |                            |
| Which should be used in anaesthesiology clinical program                                                                                                                                                                                                                                                  |                |       |                                  |       |           |                            |
| Covers wide range of knowledge                                                                                                                                                                                                                                                                            |                |       |                                  |       |           |                            |
| <b>Section VI</b>                                                                                                                                                                                                                                                                                         |                |       |                                  |       |           |                            |
| OSCE is better with with standardized patient (a SP is a layperson hired and trained to portray the role of actual patient, presenting a faculty defined clinical scenario with the patient history and physical symptoms for teaching and assessment purpose) than with real patients in long assessment |                |       | Yes                              | No    |           |                            |
| OSCE should be used as method of assessment in anesthesia                                                                                                                                                                                                                                                 |                |       |                                  |       |           |                            |
| Variability of examiner and patient can be removed                                                                                                                                                                                                                                                        |                |       |                                  |       |           |                            |
| OSCE is easier to pass than conventional methods                                                                                                                                                                                                                                                          |                |       |                                  |       |           |                            |
| OSCE may influence method of teaching                                                                                                                                                                                                                                                                     |                |       |                                  |       |           |                            |
| Attitude of examiner is better                                                                                                                                                                                                                                                                            |                |       |                                  |       |           |                            |
| Degree of emotional stress less in OSCE than conventional                                                                                                                                                                                                                                                 |                |       |                                  |       |           |                            |
